# Supplementary material for: Renal side effects of COVID-19 vaccines in patients with immunoglobulin A nephropathy
Source: PubMed Central journal article supplement — Kidney Res Clin Pract. 2022 Jan 13;41(1):124–7. doi: 10.23876/j.krcp.21.233 (PMC8816416; doi:10.23876/j.krcp.21.233), 2022-01-13
Supplement: j-krcp-21-233suppl.pdf [file j-krcp-21-233suppl.pdf]

## References

- Bomback AS, Kudose S, D'Agati VD. De novo and relapsing glomerular diseases after COVID-19 vaccination: what do we know so far? *Am J Kidney Dis* 2021;78:477–480.
- Perrin P, Bassand X, Benotmane I, Bouvier N. Gross hematuria following SARS-CoV-2 vaccination in patients with IgA nephropathy. *Kidney Int* 2021;100:466–468.
- Hanna C, Herrera Hernandez LP, Bu L, et al. IgA nephropathy presenting as macroscopic hematuria in 2 pediatric patients after receiving the Pfizer COVID-19 vaccine. *Kidney Int* 2021;100:705–706.
- Negrea L, Rovin BH. Gross hematuria following vaccination for severe acute respiratory syndrome coronavirus 2 in 2 patients with IgA nephropathy. *Kidney Int* 2021;99:1487.
- Rahim SEG, Lin JT, Wang JC. A case of gross hematuria and IgA nephropathy flare-up following SARS-CoV-2 vaccination. *Kidney Int* 2021;100:238.
- Plasse R, Nee R, Gao S, Olson S. Acute kidney injury with gross hematuria and IgA nephropathy after COVID-19 vaccination. *Kidney Int* 2021;100:944–945.
- Park K, Miyake S, Tai C, Tseng M, Andeen NK, Kung VL. Letter regarding: “A Case of Gross Hematuria and IgA Nephropathy Flare-Up Following SARS-CoV-2 Vaccination”. *Kidney Int Rep* 2021;6:2246–2247.
- Obeid M, Fenwick C, Pantaleo G. Reactivation of IgA vasculitis after COVID-19 vaccination. *Lancet Rheumatol* 2021;3:e617.
- Anderegga MA, Liu M, Saganas C, et al. De novo vasculitis after mRNA-1273 (Moderna) vaccination. *Kidney Int* 2021;100:474–476.
- Tan HZ, Tan RY, Choo JCI, et al. Is COVID-19 vaccination unmasking glomerulonephritis? *Kidney Int* 2021;100:469–471.
- Kudose S, Friedmann P, Albajrami O, D'Agati VD. Histologic correlates of gross hematuria following Moderna COVID-19 vaccine in patients with IgA nephropathy. *Kidney Int* 2021;100:468–469.
- Abramson M, Mon-Wei Yu S, Campbell KN, Chung M, Salem F. IgA nephropathy after SARS-CoV-2 vaccination. *Kidney Med* 2021;3:860–863.
- Patrapornpisut P, Avila-Casado C, Reich HN. IgA nephropathy: core curriculum 2021. *Am J Kidney Dis* 2021;78:429–441.
- Sahin U, Muik A, Derhovanessian E, et al. COVID-19 vaccine BNT162b1 elicits human antibody and TH1 T cell responses. *Nature* 2020;586:594–599.
- Villa M, Díaz-Crespo F, Pérez de José A, et al. A case of ANCA-associated vasculitis after AZD1222 (Oxford-AstraZeneca) SARS-CoV-2 vaccination: casualty or causality? *Kidney Int* 2021;100:937–938.
- Gillion V, Jadoul M, Demoulin N, Aydin S, Devresse A. Granulomatous vasculitis after the AstraZeneca anti-SARS-CoV-2 vaccine. *Kidney Int* 2021;100:706–707.
- Sirufu MM, Raggiunti M, Magnanimiti LM, Ginaldi L, De Martinis M. Henoch-Schönlein purpura following the first dose of COVID-19 viral vector vaccine: a case report. *Vaccines (Basel)* 2021;9:1078.
